# Supplementary material
Source: PubMed Central journal article supplement (PMC4741318)
Supplement: supp_pp.15.00005_00005R1_Supplemental_Table_S2.pdf [file supp_pp.15.00005_00005R1_Supplemental_Table_S2.pdf]

**Table S2. Plant dwarfism observed in greenhouse is associated with the presence of ga5-184**

| SN | Genotype information | the ga5-184 allele | Plant dwarfism   |
|----|----------------------|--------------------|------------------|
| 1  | SAO_Accession-1      | SAO-type           | Yes              |
| 2  | SAO_Accession-2      | SAO-type           | Yes              |
| 3  | SAO_Accession-5      | SAO-type           | Yes              |
| 4  | SAO_Accession-6      | SAO-type           | Yes              |
| 5  | SAO_Accession-8      | SAO-type           | Yes              |
| 6  | SAO_Accession-9      | SAO-type           | Yes              |
| 7  | SAO_Accession-10     | SAO-type           | Yes              |
| 8  | SAO_Accession-11     | SAO-type           | Yes              |
| 9  | SAO_Accession-12     | SAO-type           | Yes              |
| 10 | SAO_Accession-13     | SAO-type           | Yes              |
| 11 | SAO_Accession-15     | SAO-type           | Yes              |
| 12 | SAO_Accession-16     | SAO-type           | Yes              |
| 13 | SAO_Accession-17     | Col-type           | No               |
| 14 | SAO_Accession-18     | SAO-type           | Yes              |
| 15 | SAO_Accession-19     | SAO-type           | Yes              |
| 16 | SAO_Accession-20     | Col-type           | data unavailable |
| 17 | SAO_Accession-21     | SAO-type           | Yes              |
| 18 | SF3_Accession-1      | SAO-type           | Yes              |
| 19 | SF3_Accession-2      | SAO-type           | Yes              |
| 20 | SF3_Accession-3      | Col-type           | No               |
| 21 | SF3_Accession-4      | Col-type           | No               |
| 22 | SF3_Accession-5      | Col-type           | No               |
| 23 | SF3_Accession-6      | Col-type           | No               |
| 24 | SF3_Accession-7      | Col-type           | No               |
| 25 | SF3_Accession-8      | SAO-type           | Yes              |
| 26 | SF3_Accession-9      | Col-type           | no               |
| 27 | SF3_Accession-10     | SAO-type           | Yes              |
| 28 | SF3_Accession-11     | SAO-type           | Yes              |
| 29 | SF3_Accession-12     | Col-type           | No               |
| 30 | SF3_Accession-13     | SAO-type           | Yes              |
| 31 | SF3_Accession-14     | SAO-type           | Yes              |
| 32 | SF3_Accession-16     | SAO-type           | Yes              |
| 33 | SF3_Accession-17     | SAO-type           | Yes              |
| 34 | SF3_Accession-18     | Col-type           | No               |

|    |                  |          |                  |
|----|------------------|----------|------------------|
| 35 | SF3_Accession-19 | SAO-type | data unavailable |
| 36 | SF3_Accession-20 | Col-type | No               |
| 37 | SF3_Accession-21 | SAO-type | data unavailable |
| 38 | SF3_Accession-22 | SAO-type | Yes              |
| 39 | SF3_Accession-23 | SAO-type | Yes              |
| 40 | SF3_Accession-24 | SAO-type | Yes              |
| 41 | SF3_Accession-25 | Col-type | No               |
| 42 | SF3_Accession-26 | SAO-type | Yes              |
| 43 | SF3_Accession-28 | SAO-type | Yes              |
| 44 | BRI_Accession-1  | Col-type | No               |
| 45 | BRI_Accession-2  | Col-type | No               |
| 46 | BRI_Accession-3  | Col-type | No               |
| 47 | BRI_Accession-4  | Col-type | No               |
| 48 | BRI_Accession-5  | Col-type | No               |
| 49 | BRI_Accession-6  | Col-type | No               |
| 50 | BRI_Accession-7  | Col-type | No               |
| 51 | BRI_Accession-9  | Col-type | No               |
| 52 | BRI_Accession-11 | Col-type | No               |
| 53 | BRI_Accession-12 | Col-type | No               |
| 54 | BRI_Accession-13 | Col-type | No               |
| 55 | BRI_Accession-14 | Col-type | No               |
| 56 | BRI_Accession-15 | Col-type | No               |
| 57 | BRI_Accession-17 | Col-type | No               |
| 58 | NAT_Accession-1  | Col-type | No               |
| 59 | NAT_Accession-2  | Col-type | No               |
| 60 | NAT_Accession-3  | Col-type | No               |
| 61 | NAT_Accession-4  | Col-type | No               |
| 62 | NAT_Accession-5  | Col-type | No               |
| 63 | NAT_Accession-6  | Col-type | No               |
| 64 | NAT_Accession-7  | Col-type | No               |
| 65 | NAT_Accession-8  | Col-type | No               |
| 66 | NAT_Accession-9  | Col-type | No               |
| 67 | NAT_Accession-10 | Col-type | No               |
| 68 | NAT_Accession-11 | Col-type | No               |
| 69 | NAT_Accession-12 | Col-type | No               |
| 70 | EGG_Accession-3  | Col-type | No               |
| 71 | EGG_Accession-5  | Col-type | No               |

|     |                  |          |    |
|-----|------------------|----------|----|
| 72  | EGG_Accession-7  | Col-type | No |
| 73  | EGG_Accession-8  | Col-type | No |
| 74  | EGG_Accession-9  | Col-type | No |
| 75  | EGG_Accession-10 | Col-type | No |
| 76  | EGG_Accession-12 | Col-type | No |
| 77  | EGG_Accession-13 | Col-type | No |
| 78  | EGG_Accession-14 | Col-type | No |
| 79  | EGG_Accession-15 | Col-type | No |
| 80  | EGG_Accession-16 | Col-type | No |
| 81  | EGG_Accession-17 | Col-type | No |
| 82  | EGG_Accession-18 | Col-type | No |
| 83  | EGG_Accession-20 | Col-type | No |
| 84  | EGG_Accession-22 | Col-type | No |
| 85  | AUS_Accession-1  | Col-type | No |
| 86  | AUS_Accession-2  | Col-type | No |
| 87  | AUS_Accession-3  | Col-type | No |
| 88  | AUS_Accession-4  | Col-type | No |
| 89  | AUS_Accession-5  | Col-type | No |
| 90  | AUS_Accession-6  | Col-type | No |
| 91  | AUS_Accession-7  | Col-type | No |
| 92  | AUS_Accession-10 | Col-type | No |
| 93  | AUS_Accession-11 | Col-type | No |
| 94  | AUS_Accession-12 | Col-type | No |
| 95  | AUS_Accession-13 | Col-type | No |
| 96  | AUS_Accession-14 | Col-type | No |
| 97  | AUS_Accession-15 | Col-type | No |
| 98  | AUS_Accession-16 | Col-type | No |
| 99  | AUS_Accession-18 | Col-type | No |
| 100 | GEI_Accession-1  | Col-type | No |
| 101 | GEI_Accession-2  | Col-type | No |
| 102 | GEI_Accession-3  | Col-type | No |
| 103 | GEI_Accession-4  | Col-type | No |
| 104 | GEI_Accession-5  | Col-type | No |
| 105 | GEI_Accession-6  | Col-type | No |
| 106 | GEI_Accession-7  | Col-type | No |
| 107 | GEI_Accession-8  | Col-type | No |
| 108 | RI1_Accession-1  | Col-type | No |

|     |                  |          |    |
|-----|------------------|----------|----|
| 109 | RI1_Accession-3  | Col-type | No |
| 110 | RI1_Accession-4  | Col-type | No |
| 111 | RI1_Accession-5  | Col-type | No |
| 112 | RI1_Accession-6  | Col-type | No |
| 113 | RI1_Accession-7  | Col-type | No |
| 114 | RI1_Accession-8  | Col-type | No |
| 115 | RI1_Accession-9  | Col-type | No |
| 116 | RI1_Accession-10 | Col-type | No |
| 117 | RI1_Accession-11 | Col-type | No |
| 118 | RI1_Accession-12 | Col-type | No |
| 119 | RI1_Accession-13 | Col-type | No |
| 120 | RI1_Accession-14 | Col-type | No |
| 121 | RI1_Accession-17 | Col-type | No |
| 122 | BRA_Accession-4  | Col-type | No |
| 123 | BRA_Accession-5  | Col-type | No |
| 124 | BRA_Accession-6  | Col-type | No |
| 125 | SF1_Accession-1  | Col-type | No |
| 126 | SF1_Accession-2  | Col-type | No |
| 127 | SF1_Accession-3  | Col-type | No |
| 128 | SF1_Accession-5  | Col-type | No |
| 129 | SF1_Accession-6  | Col-type | No |
| 130 | SF1_Accession-7  | Col-type | No |
| 131 | SF1_Accession-10 | Col-type | No |
| 132 | SF1_Accession-13 | Col-type | No |
| 133 | SF1_Accession-14 | Col-type | No |
| 134 | SF1_Accession-15 | Col-type | No |
| 135 | SF1_Accession-16 | Col-type | No |
| 136 | SF1_Accession-17 | Col-type | No |
| 137 | SF1_Accession-18 | Col-type | No |
| 138 | SF1_Accession-19 | Col-type | No |
| 139 | SF1_Accession-20 | Col-type | No |
| 140 | SF1_Accession-21 | Col-type | No |
| 141 | SF1_Accession-22 | Col-type | No |
| 142 | SF1_Accession-23 | Col-type | No |
| 143 | SF1_Accession-24 | Col-type | No |
| 144 | SF1_Accession-25 | Col-type | No |
| 145 | SF1_Accession-26 | Col-type | No |

|     |                  |          |    |
|-----|------------------|----------|----|
| 146 | SF1_Accession-27 | Col-type | No |
| 147 | GRA_Accession-1  | Col-type | No |
| 148 | GRA_Accession-2  | Col-type | No |
| 149 | GRA_Accession-3  | Col-type | No |
| 150 | GRA_Accession-4  | Col-type | No |
| 151 | GRA_Accession-5  | Col-type | No |
| 152 | GRA_Accession-6  | Col-type | No |
| 153 | GRA_Accession-8  | Col-type | No |
| 154 | GRA_Accession-9  | Col-type | No |
| 155 | GRA_Accession-10 | Col-type | No |
| 156 | GRA_Accession-12 | Col-type | No |
| 157 | GRA_Accession-13 | Col-type | No |
| 158 | GRA_Accession-14 | Col-type | No |
| 159 | GRA_Accession-15 | Col-type | No |
| 160 | GRA_Accession-16 | Col-type | No |
| 161 | GRA_Accession-17 | Col-type | No |
| 162 | GRA_Accession-18 | Col-type | No |
| 163 | ZIN_Accession-1  | Col-type | No |
| 164 | ZIN_Accession-2  | Col-type | No |
| 165 | ZIN_Accession-3  | Col-type | No |
| 166 | ZIN_Accession-4  | Col-type | No |
| 167 | ZIN_Accession-5  | Col-type | No |
| 168 | ZIN_Accession-6  | Col-type | No |
| 169 | ZIN_Accession-7  | Col-type | No |
| 170 | ZIN_Accession-8  | Col-type | No |
| 171 | ZIN_Accession-9  | Col-type | No |
| 172 | ZIN_Accession-10 | Col-type | No |
| 173 | ZIN_Accession-11 | Col-type | No |
| 174 | ZIN_Accession-12 | Col-type | No |
| 175 | ZIN_Accession-13 | Col-type | No |
| 176 | ZIN_Accession-14 | Col-type | No |
| 177 | ZIN_Accession-15 | Col-type | No |
| 178 | ZIN_Accession-16 | Col-type | No |
| 179 | ZIN_Accession-17 | Col-type | No |
| 180 | ZIN_Accession-18 | Col-type | No |
| 181 | ZIN_Accession-19 | Col-type | No |
| 182 | ZIN_Accession-20 | Col-type | No |

|     |                  |          |    |
|-----|------------------|----------|----|
| 183 | ZIN_Accession-21 | Col-type | No |
| 184 | ZIN_Accession-22 | Col-type | No |
| 185 | ZIN_Accession-23 | Col-type | No |
| 186 | ZIN_Accession-24 | Col-type | No |
| 187 | RI2_Accession-1  | Col-type | No |
| 188 | RI2_Accession-2  | Col-type | No |
| 189 | RI2_Accession-3  | Col-type | No |
| 190 | RI2_Accession-4  | Col-type | No |
| 191 | RI2_Accession-5  | Col-type | No |
| 192 | RI2_Accession-6  | Col-type | No |
| 193 | RI2_Accession-7  | Col-type | No |
| 194 | RI2_Accession-8  | Col-type | No |
| 195 | RI2_Accession-9  | Col-type | No |
| 196 | RI2_Accession-10 | Col-type | No |
| 197 | RI2_Accession-11 | Col-type | No |
| 198 | RI2_Accession-12 | Col-type | No |
| 199 | SF2_Accession-1  | Col-type | No |
| 200 | SF2_Accession-2  | Col-type | No |
| 201 | SF2_Accession-3  | Col-type | No |
| 202 | SF2_Accession-4  | Col-type | No |
| 203 | SF2_Accession-5  | Col-type | No |
| 204 | SF2_Accession-6  | Col-type | No |
| 205 | SF2_Accession-7  | Col-type | No |
| 206 | SF2_Accession-8  | Col-type | No |
| 207 | SF2_Accession-9  | Col-type | No |
| 208 | SF2_Accession-10 | Col-type | No |
| 209 | SF2_Accession-11 | Col-type | No |
| 210 | SF2_Accession-12 | Col-type | No |
| 211 | SF2_Accession-13 | Col-type | No |
| 212 | SF2_Accession-14 | Col-type | No |
| 213 | SF2_Accession-15 | Col-type | No |
| 214 | SF2_Accession-16 | Col-type | No |
| 215 | SF2_Accession-17 | Col-type | No |
| 216 | SF2_Accession-18 | Col-type | No |
| 217 | SF2_Accession-19 | Col-type | No |
| 218 | SF2_Accession-20 | Col-type | No |
| 219 | SF2_Accession-21 | Col-type | No |

|     |                  |          |    |
|-----|------------------|----------|----|
| 220 | SF2_Accession-22 | Col-type | No |
| 221 | SF2_Accession-23 | Col-type | No |
| 222 | SAB_Accession-1  | Col-type | No |
| 223 | SAB_Accession-2  | Col-type | No |
| 224 | SAB_Accession-3  | Col-type | No |
| 225 | SAB_Accession-4  | Col-type | No |
| 226 | SAB_Accession-5  | Col-type | No |
| 227 | SAB_Accession-6  | Col-type | No |
| 228 | SAB_Accession-8  | Col-type | No |
| 229 | SAB_Accession-9  | Col-type | No |
| 230 | SAB_Accession-10 | Col-type | No |
| 231 | SAB_Accession-11 | Col-type | No |
| 232 | N3879-Col(gl1)   | Col-type | No |
| 233 | N8580-Cvi        | Col-type | No |
| 234 | N8581-Ler-2      | Col-type | No |
| 235 | N902-Cvi-0       | Col-type | No |
| 236 | N952-Ba-1        | Col-type | No |
| 237 | N1064-Can-0      | Col-type | No |
| 238 | N1068-Cha-0      | Col-type | No |
| 239 | N1070-Cha-1      | Col-type | No |
| 240 | N1096-Cvi-0      | Col-type | No |
| 241 | N1186-Ge-0       | Col-type | No |
| 242 | N1238-In-0       | Col-type | No |
| 243 | N1244-Ita-0      | Col-type | No |
| 244 | N1266-Kä*        | Col-type | No |
| 245 | N1373-Mr-0       | Col-type | No |
| 246 | N1454-Pi-0       | Col-type | No |
| 247 | N1456-Pi-2       | Col-type | No |
| 248 | N1487-Ron-0      | Col-type | No |
| 249 | N1500-Sah-0      | Col-type | No |
| 250 | N1504-Sei-0      | Col-type | No |
| 251 | N1622-Yo-0       | Col-type | No |
| 252 | N1630-Wi-0       | Col-type | No |
| 253 | N916-Kondara     | Col-type | No |
| 254 | N921-Enkheim-T   | Col-type | No |
| 255 | N968-BI-1        | Col-type | No |
| 256 | N970-Bla-1       | Col-type | No |

|     |                     |          |    |
|-----|---------------------|----------|----|
| 257 | N996-Bs-1           | Col-type | No |
| 258 | N1084-Co-1          | Col-type | No |
| 259 | N1106-Di-0          | Col-type | No |
| 260 | N1108-Di-1          | Col-type | No |
| 261 | N1198-Gr-1          | Col-type | No |
| 262 | N1268-Kb-0          | Col-type | No |
| 263 | N1270-Kil-0         | Col-type | No |
| 264 | N1452-Pf-0          | Col-type | No |
| 265 | N1458-Pla-0         | Col-type | No |
| 266 | N1520-Sg-2          | Col-type | No |
| 267 | N1540-Su-0          | Col-type | No |
| 268 | N1566-Tu-0          | Col-type | No |
| 269 | N1656-Alc-0         | Col-type | No |
| 270 | N8067-Buckhorn Pass | Col-type | No |
| 271 | N8069-Santa Clara   | Col-type | No |
| 272 | N22676-Bay-0        | Col-type | No |
| 273 | N22677-Bor-4        | Col-type | No |
| 274 | N22678-Br-0         | Col-type | No |
| 275 | N22679-Bur-0        | Col-type | No |
| 276 | N22680-C24          | Col-type | No |
| 277 | N22681-Col-0        | Col-type | No |
| 278 | N22682-Cvi-0        | Col-type | No |
| 279 | N22683-Est-1        | Col-type | No |
| 280 | N22684-Fei-0        | Col-type | No |
| 281 | N22685-Got-7        | Col-type | No |
| 282 | N22686-Ler-1        | Col-type | No |
| 283 | N22687-Nfa-8        | Col-type | No |
| 284 | N22689-Rrs-10       | Col-type | No |
| 285 | N22690-Sha          | Col-type | No |
| 286 | N22691-Tamm-2       | Col-type | No |
| 287 | N22692-Ts-1         | Col-type | No |
| 288 | N22693-Tsu-1        | Col-type | No |
| 289 | N22694-Van-0        | Col-type | No |
| 290 | N22695-Lov-5        | Col-type | No |
