# Supplementary material
Source: PubMed Central journal article supplement (PMC4741318)
Supplement: supp_pp.15.00005_00005R1_Supplemental_Table_S3.pdf [file supp_pp.15.00005_00005R1_Supplemental_Table_S3.pdf]

**Table S3. Information for 58 worldwide *Arabidopsis thaliana* accessio**

| Stock Number | Name   |
|--------------|--------|
| N1064        | Can-0  |
| N1068        | Cha-0  |
| N1070        | Cha-1  |
| N1084        | Co-1   |
| N1106        | Di-0   |
| N1108        | Di-1   |
| N1186        | Ge-0   |
| N1198        | Gr-1   |
| N1238        | In-0   |
| N1244        | Ita-0  |
| N1266        | Kaer-0 |
| N1268        | Kb-0   |
| N1270        | Kil-0  |
| N1373        | Mr-0   |
| N1452        | Pf-0   |
| N1454        | Pi-0   |
| N1456        | Pi-2   |
| N1458        | Pla-0  |
| N1487        | Ron-0  |
| N1500        | Sah-0  |
| N1504        | Sei-0  |
| N1520        | Sg-2   |
| N1540        | Su-0   |
| N1566        | Tu-0   |
| N1622        | Yo-0   |
| N1630        | Wi-0   |
| N1656        | Alc-0  |
| N22676       | Bay-0  |
| N22677       | Bor-4  |
| N22678       | Br-0   |
| N22679       | Bur-0  |
| N22680       | C24    |

|        |               |
|--------|---------------|
| N22681 | Col-0         |
| N22683 | Est-1         |
| N22684 | Fei-0         |
| N22685 | Got-7         |
| N22686 | Ler-1         |
| N22687 | Nfa-8         |
| N22689 | Rrs-10        |
| N22690 | Sha           |
| N22691 | Tamm-2        |
| N22692 | Ts-1          |
| N22693 | Tsu-1         |
| N22694 | Van-0         |
| N22695 | Lov-5         |
| N3879  | Col(gl1)      |
| N8067  | Buckhorn Pass |
| N8069  | Santa Clara   |
| N8580  | Cvi-1         |
| N8581  | Ler-2         |
| N902   | Cvi-0         |
| N916   | Kondara       |
| N921   | Enkheim-T     |
| N952   | Ba-1          |
| N968   | Bl-1          |
| N970   | Bla-1         |
| N996   | Bs-1          |
| NW20   | Ler-0         |

**ns used in this study.**
