# Supplementary material
Source: PubMed Central journal article supplement (PMC4741318)
Supplement: supp_pp.15.00005_00005R1_Supplemental_Table_S7.pdf [file supp_pp.15.00005_00005R1_Supplemental_Table_S7.pdf]

**Table S7. Primers used for fine mapping, direct sequencing and transgene in this study**

| Name  | Direction | Sequence (5' - 3')        | Purpose        |
|-------|-----------|---------------------------|----------------|
| FM08  | Forward   | CTGTGCCATCCACCCAACAACGT   | Fine mapping   |
|       | Reverse   | GTGACAGTGTTAGCGTCTCTGGGG  | Fine mapping   |
| FM09  | Forward   | AACCGCTGTATACTCATAAGCGT   | Fine mapping   |
|       | Reverse   | CACAAAAGCTCAAGATGGAAGTCA  | Fine mapping   |
| FM10  | Forward   | TCTCCATTCACATATCGTGCATTGC | Fine mapping   |
|       | Reverse   | AGCAACTTGTGTTCTCATTCTC    | Fine mapping   |
| FM11  | Forward   | CGAGAAAACACTACGCACGTACCA  | Fine mapping   |
|       | Reverse   | CCAAGTTTATTGTTTCAGCGAGA   | Fine mapping   |
| FM12  | Forward   | CATAAGTCTTCTACAGTTACGGT   | Fine mapping   |
|       | Reverse   | GAAATCAAACATTTAACATGTCT   | Fine mapping   |
| GA5_A | Forward   | TGATGAAACCCCAAGATG        | Sequencing GA5 |
|       | Reverse   | GGCGTAAAACGGGACTAC        | Sequencing GA5 |
| GA5_B | Forward   | AATGAGGTCCTGTTCTAG        | Sequencing GA5 |
|       | Reverse   | TCAAACCTCCGTTAATCTTC      | Sequencing GA5 |
| GA5_C | Forward   | TGGAGGATGGATCAGAGAGA      | Sequencing GA5 |
|       | Reverse   | TTTAATATGCAACTACGTAA      | Sequencing GA5 |

|           |         |                                      |                      |
|-----------|---------|--------------------------------------|----------------------|
| GA5_Col-0 | Forward | CGGGATCC AGTTGTTAGTACTTCTTTGTCCCAGGA | Cloning GA5_Col-0    |
|           | Reverse | AACTGCAGAGACCCAACTACAGAAACAAGACCACA  | Cloning GA5_Col-0    |
| GA5_CT    | Forward | CTCCTGAGGAAGAAGACAAA                 | Transgene validation |
|           | Reverse | AGTGGAGGATGGATCAGAGA                 | Transgene validation |
