# Supplementary material
Source: PubMed Central journal article supplement (PMC4741318)
Supplement: supp_pp.15.00005_00005R1_Tables1_6.pdf [file supp_pp.15.00005_00005R1_Tables1_6.pdf]

---

**Table S1.** Information of natural *Arabidopsis thaliana* accessions from the Swiss Alps used in this study.

| <b>Accession ID</b> | <b>Name</b> | <b>Nearest Locality</b> | <b>Altitude(m, a.s.l.)</b> | <b>Latitude (N)</b> | <b>Longitude (E)</b> |
|---------------------|-------------|-------------------------|----------------------------|---------------------|----------------------|
| E002                | NAT         | Naters                  | 850                        | 46° 19' 56.0"       | 07° 59' 12.0"        |
| E004                | AUS         | Ausserberg              | 1000                       | 46° 15' 50.4"       | 07° 52' 00.9"        |
| E005                | GEI         | Geimen                  | 1030                       | 46° 20' 27.3"       | 07° 59' 02.6"        |
| E006                | RI1         | Ritzingen               | 1360                       | 46° 27' 37.3"       | 08° 13' 33.7"        |
| E008                | SF1         | Saas Fee                | 1719                       | 46° 06' 40.1"       | 07° 56' 04.5"        |
| E015                | SF2         | Saas Fee                | 1730                       | 46° 06' 38.6"       | 07° 56' 03.8"        |
| E016                | SF3         | Saas Fee                | 1792                       | 46° 06' 38.6"       | 07° 56' 03.8"        |
| E017                | SAB         | Saas Fee                | 1949                       | 46° 07' 26.3"       | 07° 55' 36.9"        |
| E011                | SAO         | Saas Fee                | 2012                       | 46° 06' 20.3"       | 07° 54' 35.0"        |
| E007                | BRA         | Brail                   | 2040                       | 46° 39' 20.7"       | 10° 01' 07.6"        |
| E018                | VLA         | Val Lavinuoz            | 2450                       | 46° 49' 11.4"       | 10° 04' 52.0"        |
| E012                | ZIN         | Zinal                   | 2700                       | 46° 09' 20.4"       | 07° 38' 40.0"        |

---

---

**Table S2 and Table S3 are presented in two Excel files, separately.**

**Table S4.** Multiple comparisons of plant height in *Arabidopsis thaliana* (11 accessions) at three transplant sites, S1 at 640m, S2 at 2000m and S3 at 2170m a.s.l., in a mixed model analysis including accession as a random factor and altitude of origin and site as fixed factors. P-values were adjusted for multiple comparisons to an overall alpha = 0.05 using false discovery rate control.

| <b>Test</b>  | <b>Estimate</b> | <b>Std. error</b> | <b>z-Value</b> | <b>P-Values</b>  |
|--------------|-----------------|-------------------|----------------|------------------|
| S2 - S1 == 0 | 66.005          | 7.459             | 8.849          | $< 2 * 10^{-16}$ |
| S3 - S1 == 0 | 39.952          | 7.545             | 4.897          | $4.16 * 10^{-6}$ |
| S3 - S2 == 0 | -29.042         | 7.497             | -3.875         | 0.0001           |

---

**Table S5.** Mixed model analysis of altitude of origin effects on total seed number in 11 accessions of *Arabidopsis thaliana* at three transplant sites.

---

|                      |    | <b>S1: 640 m</b> |                      | <b>S2: 2000 m</b> |                      | <b>S3: 2170 m</b> |         |
|----------------------|----|------------------|----------------------|-------------------|----------------------|-------------------|---------|
|                      | df | Deviance         | P-Value <sup>a</sup> | Deviance          | P-Value <sup>a</sup> | Deviance          | P-Value |
| Altitude model       | 4  | 220.32           |                      | 147.35            |                      | 136.04            | 0.2264  |
| Intercept only model | 3  | 221.28           | 0.3261               | 147.35            | 0.9789               | 137.50            | 0.2264  |

---

<sup>a</sup>P-Value of a likelihood ratio test comparing the altitude model with the intercept only model; both models had accession as a random factor.

---

**Table S6.** Selection analysis for plant height in 11 *Arabidopsis thaliana* accessions at each of three transplant sites at different altitudes. We used mixed models on relative seed number as a fitness proxy with standardized plant height as a fixed effect and accession as a random effect. Selection on plant height was tested using a likelihood ratio tests the above model and one containing only the intercept as a fixed effect.

---

|                      |           | <b>Site</b>      |                       |                   |                |                   |                |
|----------------------|-----------|------------------|-----------------------|-------------------|----------------|-------------------|----------------|
|                      |           | <b>S1: 640 m</b> |                       | <b>S2: 2000 m</b> |                | <b>S3: 2170 m</b> |                |
|                      | <b>df</b> | <b>Deviance</b>  | <b>P-Value</b>        | <b>Deviance</b>   | <b>P-Value</b> | <b>Deviance</b>   | <b>P-Value</b> |
| Plant height model   | 4         | 56.99            |                       | 142.08            |                | 150.00            |                |
| Intercept only model | 3         | 113.12           | $1.7 \times 10^{-14}$ | 146.37            | 0.0384         | 150.04            | 0.8481         |

---

**Table S7 are presented in an Excel file, separately.**
