# Supplementary material
Source: PubMed Central journal article supplement (PMC4741318)
Supplement: supp_pp.15.00005_00005suppfigs.pdf [file supp_pp.15.00005_00005suppfigs.pdf]

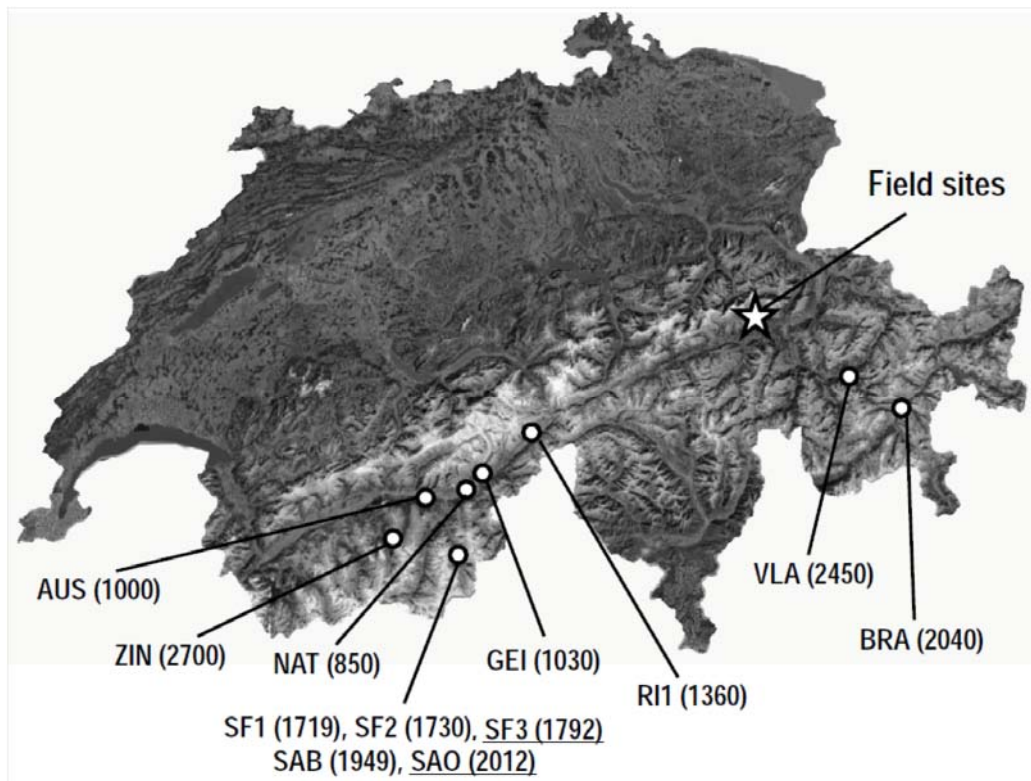

**Supplementary Figure S1.** The geographical locations in a Swiss map showing the collection sites of 11 Swiss *A. thaliana* accessions and 3 field experimental sites in this study. The accession names and their altitudes of origin (in parentheses) are shown.

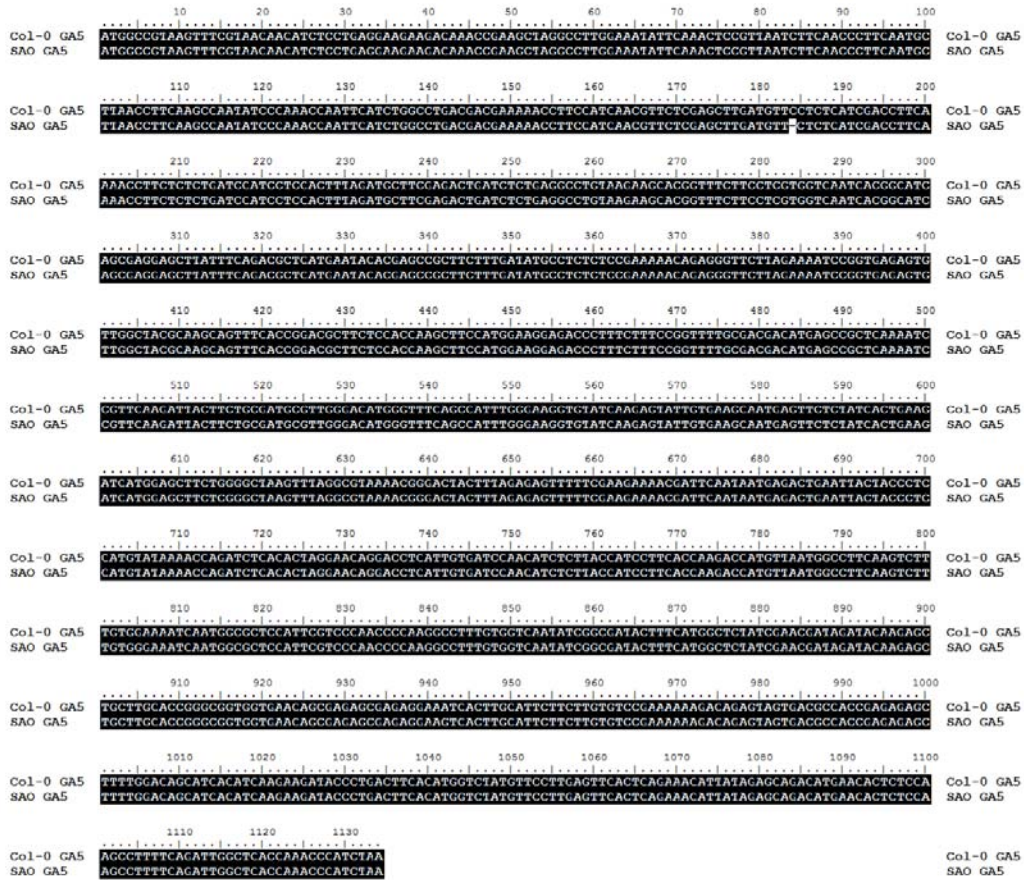

**Supplementary Figure S2.** Sequence alignment between SAO and Col-0. Full cDNA sequences were used. “-” indicates 1-bp deletion at position 184 of the SAO *ga5* gene (*ga5-184*).

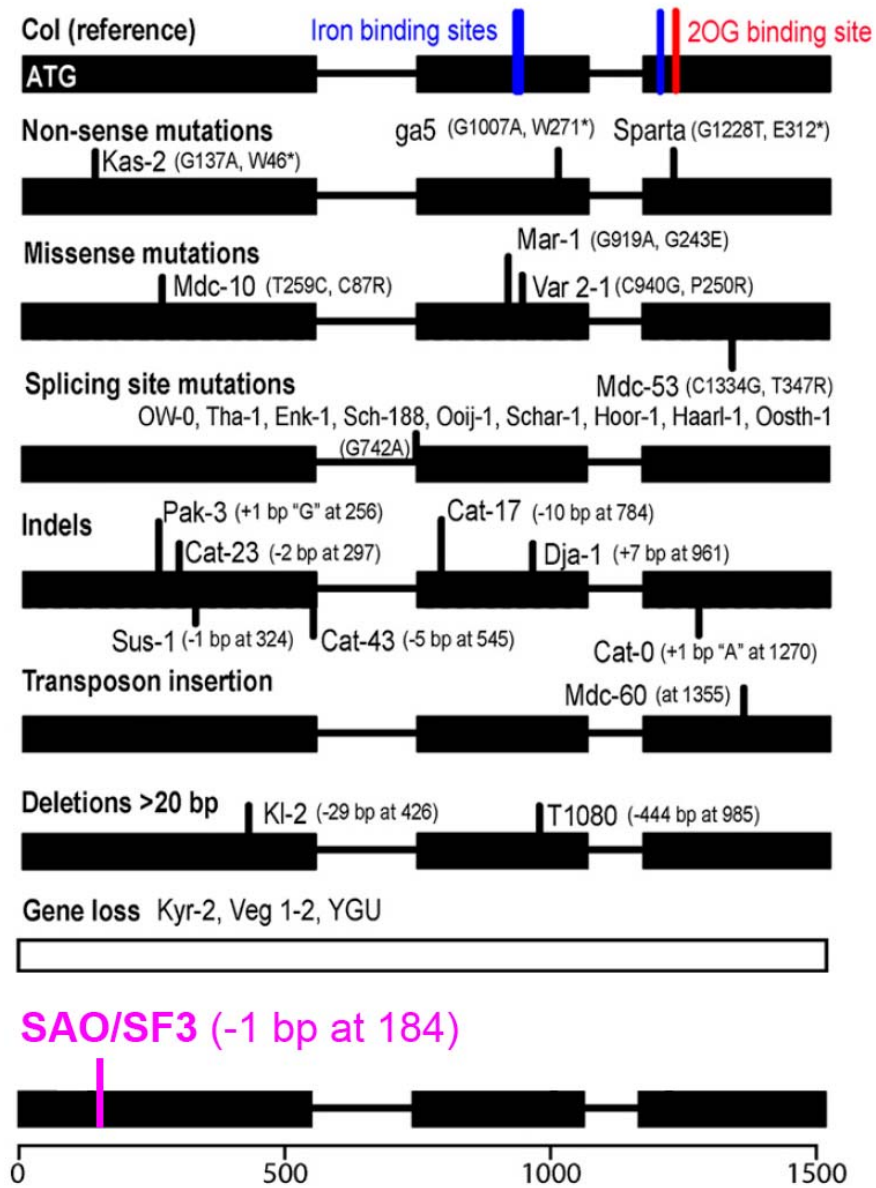

**Supplementary Figure S3.** Schematic comparison between the *ga5-184* haplotype in SAO/SF3 (at the bottom) and other loss-of function haplotypes reported in Barboza et al. (2013). Depiction of all but the SAO/SF3 haplotypes reproduced from the Figure 2 in the Barboza's publication.
